# Supplementary material for: A five-long non-coding RNA signature with the ability to predict overall survival of patients with lung adenocarcinoma
Source: PubMed Central journal article supplement — Exp Ther Med. 2019 Oct 25;18(6):4852–64. doi: 10.3892/etm.2019.8138 (PMC6862666; doi:10.3892/etm.2019.8138), 2019-10-25
Supplement: Supplementary_Data.pdf [file Supplementary_Data.pdf]

Figure S1. Expression of the 5 long non-coding RNAs in tumor and non-tumor tissues. Differential expression of (A) PRKG1-AS1, (B) ITGB1-DT, (C) NPSR1-AS1, (D) LMO7DN and (E) OGFRP1 between tumor and non-tumor tissues. The P-value are derived from the differential expression analysis, and  $P < 0.05$  was considered to indicate a statistically significant difference. \*\*\* $P < 0.001$  vs. non-tumor tissues. OGFRP1, opioid growth factor receptor pseudogene 1; ITGB1-DT, integrin subunit beta 1 divergent transcript; LMO7DN, LIM domain 7 downstream neighbor; NPSR1-AS1, neuropeptide S receptor 1-antisense RNA 1; PRKG1-AS1, protein kinase cyclic GMP-dependent 1-antisense RNA 1.

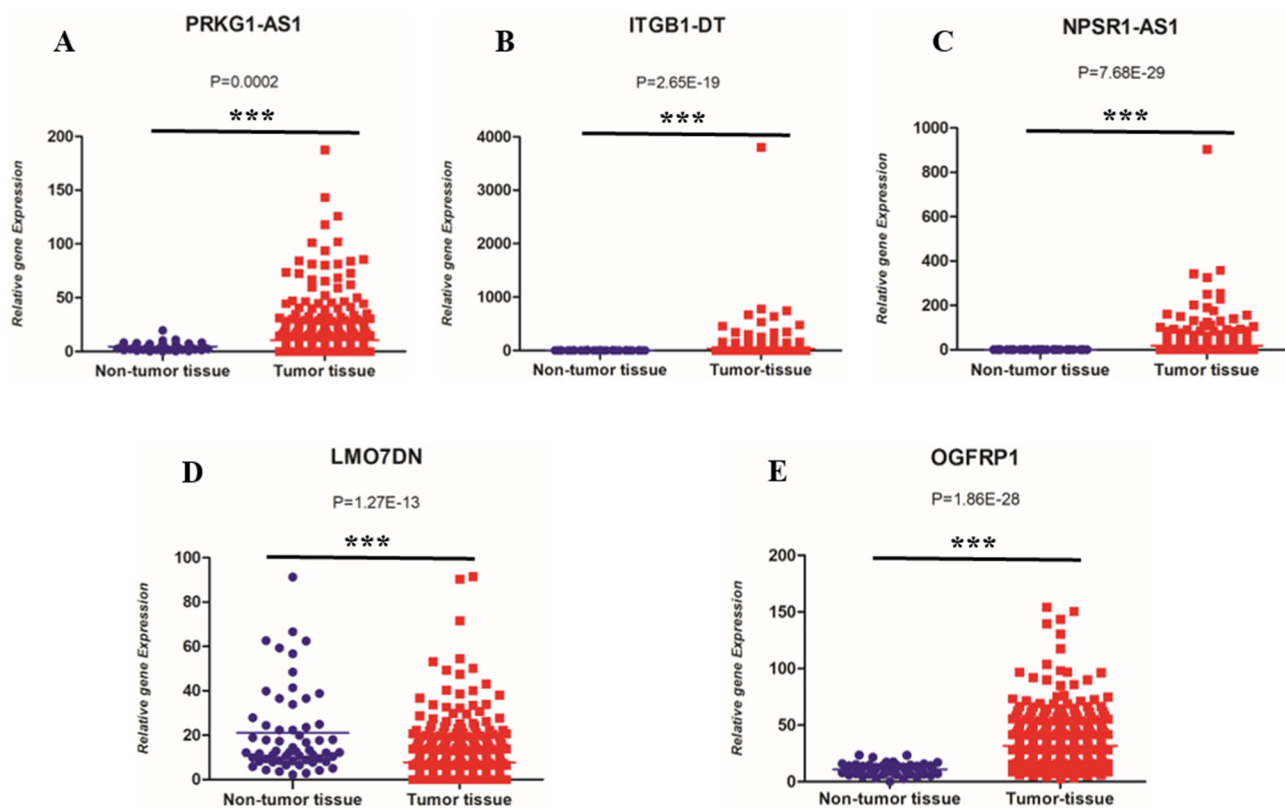

Figure S2. Results of the analysis of differentially expressed mRNAs using the same data and methods as for long non-coding RNA. (A) Forest Plot of the 5-mRNA signature. (B) Kaplan-Meier survival curves for high- and low-risk groups, and the '+' on the survival curves represents the censored data-points. (C) ROC curve of the 5-mRNA signature in predicting the 5-year survival rate. ROC, receiver operating characteristic; AUC, area under ROC curve; FAM189A2, family with sequence similarity 189 member A2; C1QTNF6, C1q and tumor necrosis factor related 6; COL22A1, collagen type XXII alpha 1 chain; NTSR1, neurotensin receptor 1; CIDEC, cell death inducing DNA fragmentation factor subunit alpha like effector c.

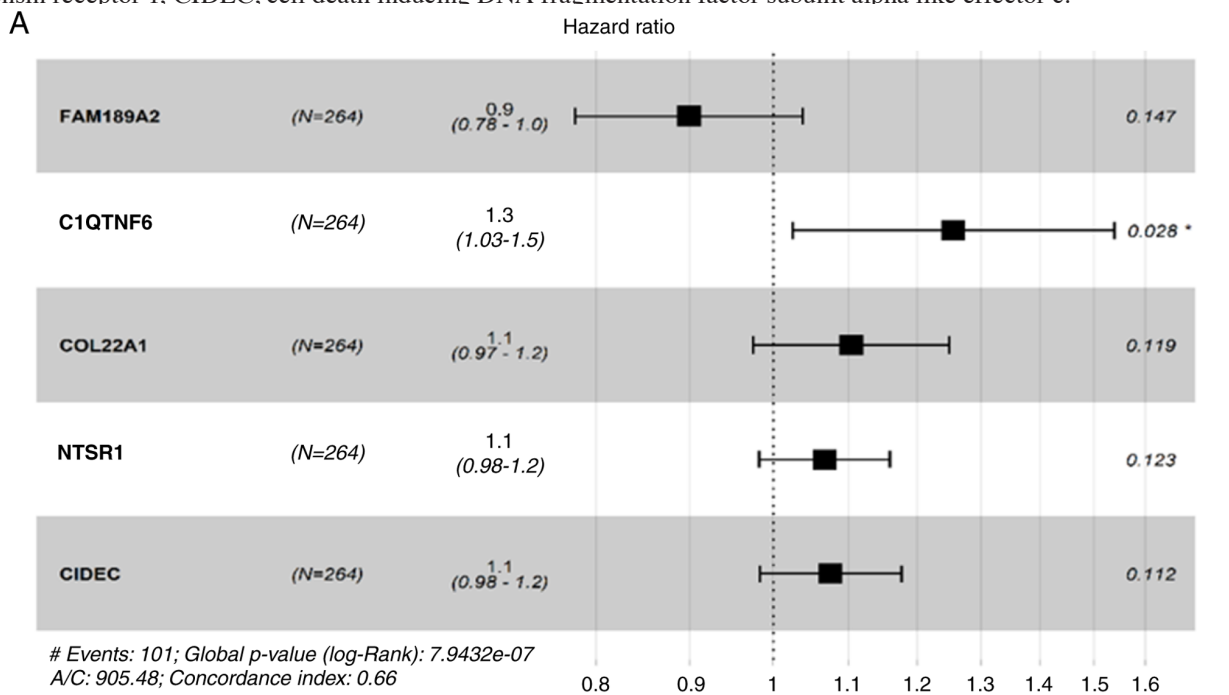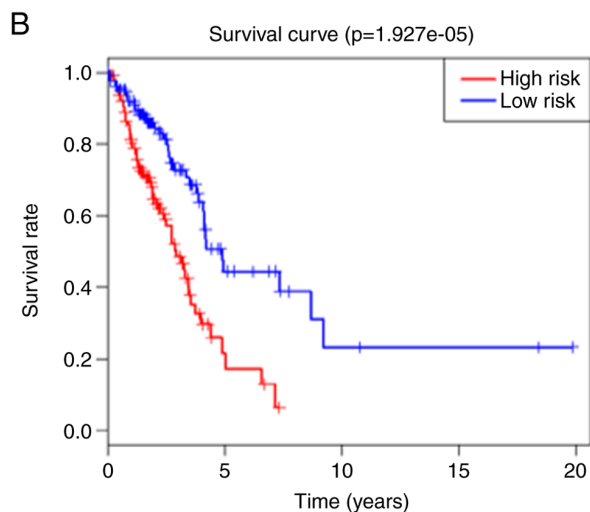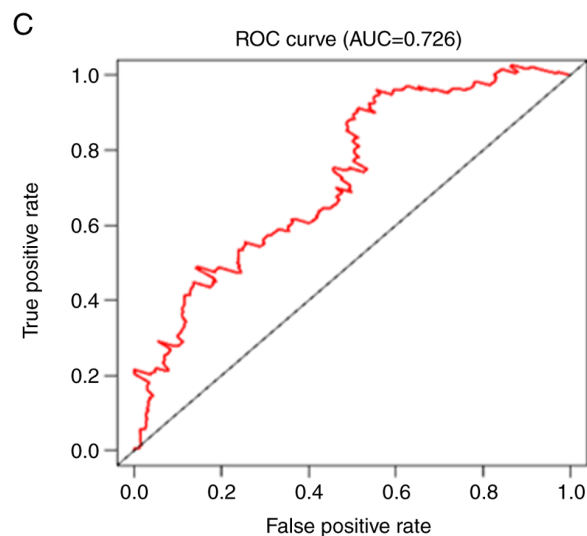

Figure S3. Results of the analysis of the differentially expressed long non-coding RNAs and mRNAs using the same data and methods as above. (A) Forest Plot of the 4-gene signature. (B) Kaplan-Meier survival curves for high- and low-risk groups, and the '+' on the survival curves represents the censored data-points. (C) ROC curve of the 4-gene signature in predicting the 5-year survival rate. COL22A1, collagen type XXII alpha 1 chain; NTSR1, neurotensin receptor 1; OGFRP1, opioid growth factor receptor pseudogene 1; LINC01322, long intergenic non-protein coding RNA 1322; ROC, receiver operating characteristic; AUC, area under ROC curve.

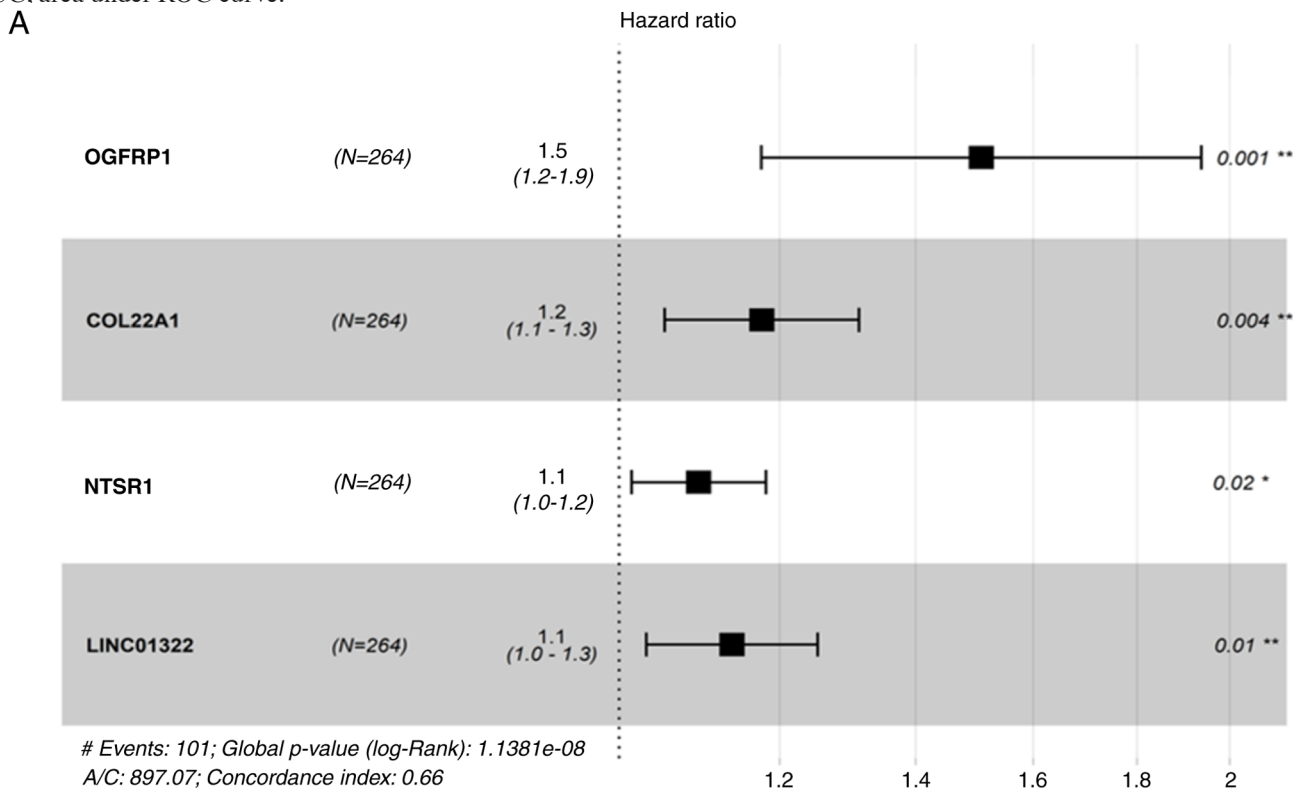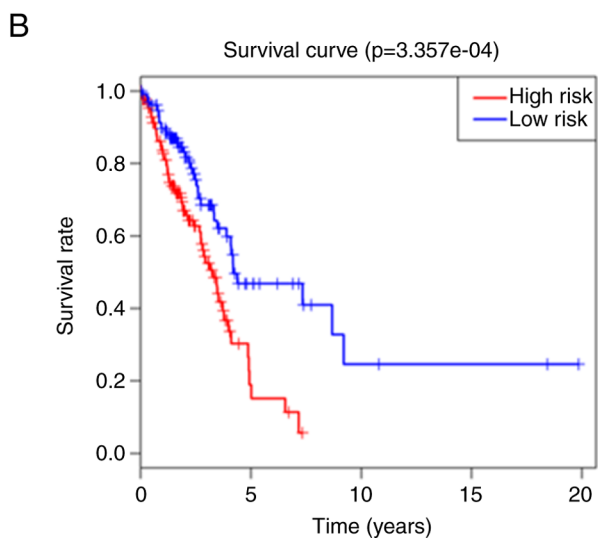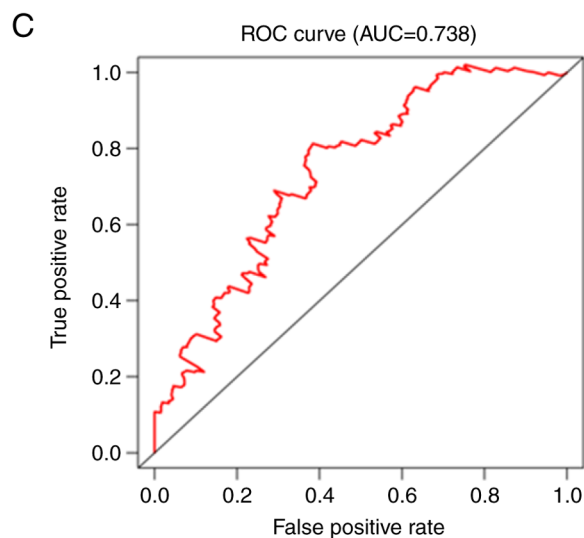

Table SI. Clinical information of 14 patients with lung adenocarcinoma.

| Patient number | Gender | Age (year) | Histology           |
|----------------|--------|------------|---------------------|
| 1              | Female | 57         | Lung adenocarcinoma |
| 2              | Female | 49         | Lung adenocarcinoma |
| 3              | Male   | 61         | Lung adenocarcinoma |
| 4              | Male   | 76         | Lung adenocarcinoma |
| 5              | Female | 55         | Lung adenocarcinoma |
| 6              | Male   | 69         | Lung adenocarcinoma |
| 7              | Male   | 66         | Lung adenocarcinoma |
| 8              | Male   | 47         | Lung adenocarcinoma |
| 9              | Female | 40         | Lung adenocarcinoma |
| 10             | Female | 43         | Lung adenocarcinoma |
| 11             | Female | 64         | Lung adenocarcinoma |
| 12             | Male   | 62         | Lung adenocarcinoma |
| 13             | Male   | 70         | Lung adenocarcinoma |
| 14             | Male   | 53         | Lung adenocarcinoma |

Table SII. Primer sequences.

| Gene      | Forward sequence (5'-3') | Reverse sequence (5'-3') |
|-----------|--------------------------|--------------------------|
| PRKG1-AS1 | CTACCAGCGAGCGTTATAGCAGAC | TGCACAGTCAGCGAGTATTGGC   |
| ITGB1-DT  | CCATTAGGAAGACGGTGCAGTGTG | GTGCCTCCTCCACCACCTACTC   |
| NPSR1-AS1 | GGAGTTCAAGTCCAACCTGGCAAC | ACTCTGGCTCTAGTGCAGTGGTG  |
| LMO7DN    | TGTATCTGGTGGAGGAGGCTTGG  | TCGGTTGTGACAATGAGGACTGT  |
| OGFRP1    | GCGTGGATTGATTGAGGAGACTGG | GCTGGCAAGTGAGGAAGGACATC  |

OGFRP1, opioid growth factor receptor pseudogene 1; ITGB1-DT, integrin subunit beta 1 divergent transcript; LMO7DN, LIM domain 7 downstream neighbor; NPSR1-AS1, neuropeptide S receptor 1-antisense RNA 1; PRKG1-AS1, protein kinase cyclic GMP-dependent 1-antisense RNA 1; chr, chromatin.
